# Supplementary material
Source: publisher site journal article supplement (https://www.dovepress.com/article/478925)
Supplement: Supplementary file 1 [file get_supplementary_file.php]

Supplementary 1: The p-values for the different concentrations of capsulated probiotics compared to control in F1,F2, and F3.

| Formula    Compared groups | F1 | F2 | F3 |
| --- | --- | --- | --- |
| 0.005mg/ml vs control | 0.3474 | 0.1823 | 0.0013 |
| 0.05mg/ml vs control | 0.1834 | 0.0008 | 0.4197 |
| 0.5mg/ml vs control | < 0.0001 | < 0.0001 | < 0.0001 |
